# Supplementary material
Source: Springer Nature journal article supplement (https://www.springermedizin.de/resource/supplementary/12882_2013_723_MOESM1_ESM.pdf/9454564)
Supplement: MOESM1 [file 9454564]

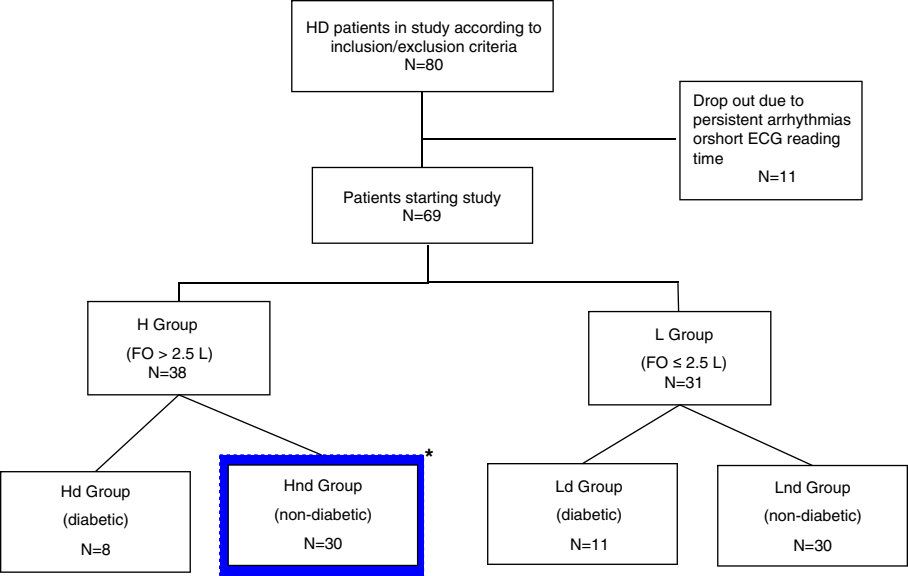

*\*Robustness of results checked in subset of this group with FO > 3L for last 3 months and willing to participate in 3-month follow-up (N=5)*
